# Supplementary material for: Paper-based visual detection of silver ions and l-cysteine with a dual-emissive nanosystem of carbon quantum dots and gold nanoclusters
Source: Royal Society of Chemistry journal article supplement (doi:10.1039/c8ay01044g), 2018-01-01
Supplement: c8ay01044g1.pdf [file c8ay01044g1.pdf]

## Supporting Information

### The paper-based visual detection of silver ions and L-cysteine with dual-emissive nano system of carbon quantum dots and gold nanoclusters

*Bingyan Han, Ying Li, Xixi Hu, Qin Yan, Jingmei Jiang, Mingbo Yu, Tingting Peng,*

*Gaohong He\**

State Key Laboratory of Fine Chemicals, School of Petroleum and Chemical Engineering, Dalian University of Technology, Panjin, Liaoning 124221, China.

E-mail: hgao hong@dlut.edu.cn; Tel: +86427-2631809

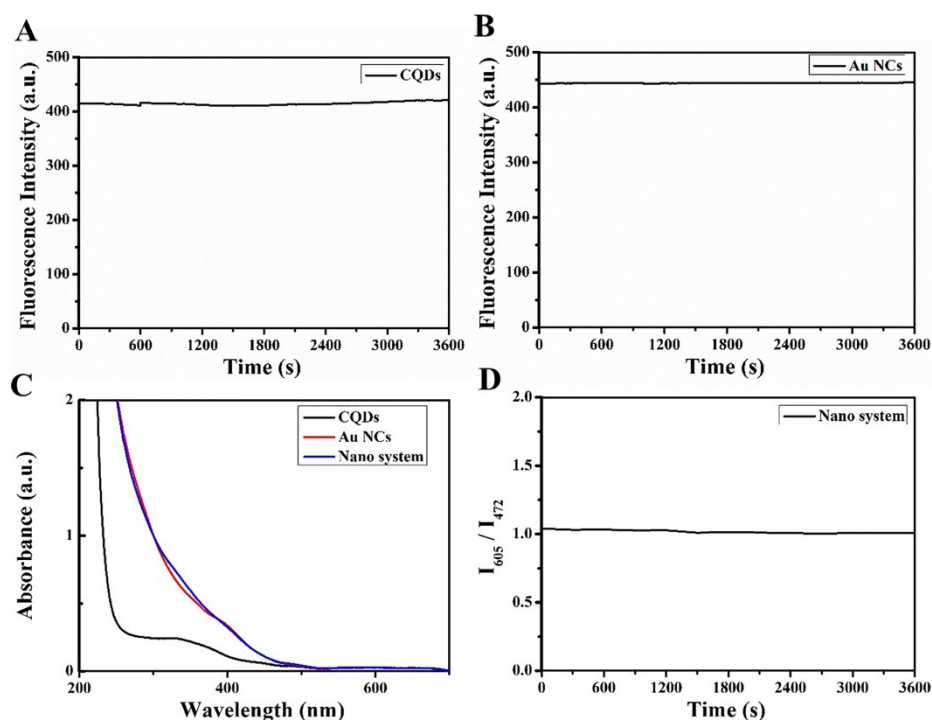

**Figure S1.** The fluorescence spectra of (A) CQDs, (B) Au NCs and (D) Nano system recorded each 5 min for 1 h under UV at 375 nm and (C) UV-vis spectra of CQDs, Au NCs and nano system.

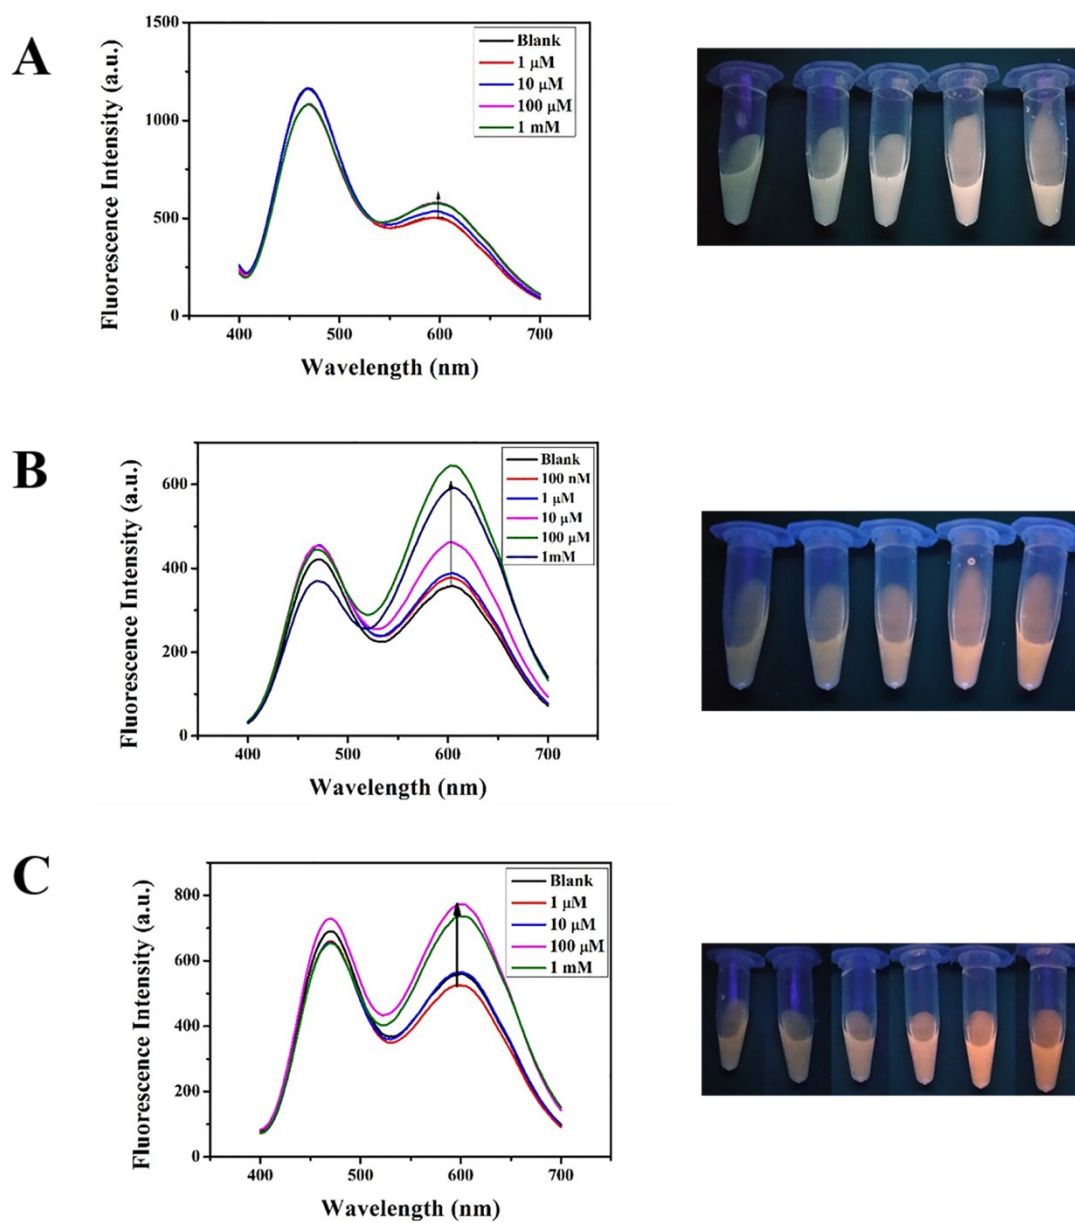

**Table S1.** Zeta potential of CQDs, Au NCs and Nano system.

| Material    | Zeta potential (mV) |
|-------------|---------------------|
| CQDs        | +3.73               |
| Au NCs      | +26.7               |
| Nano system | +34.8               |

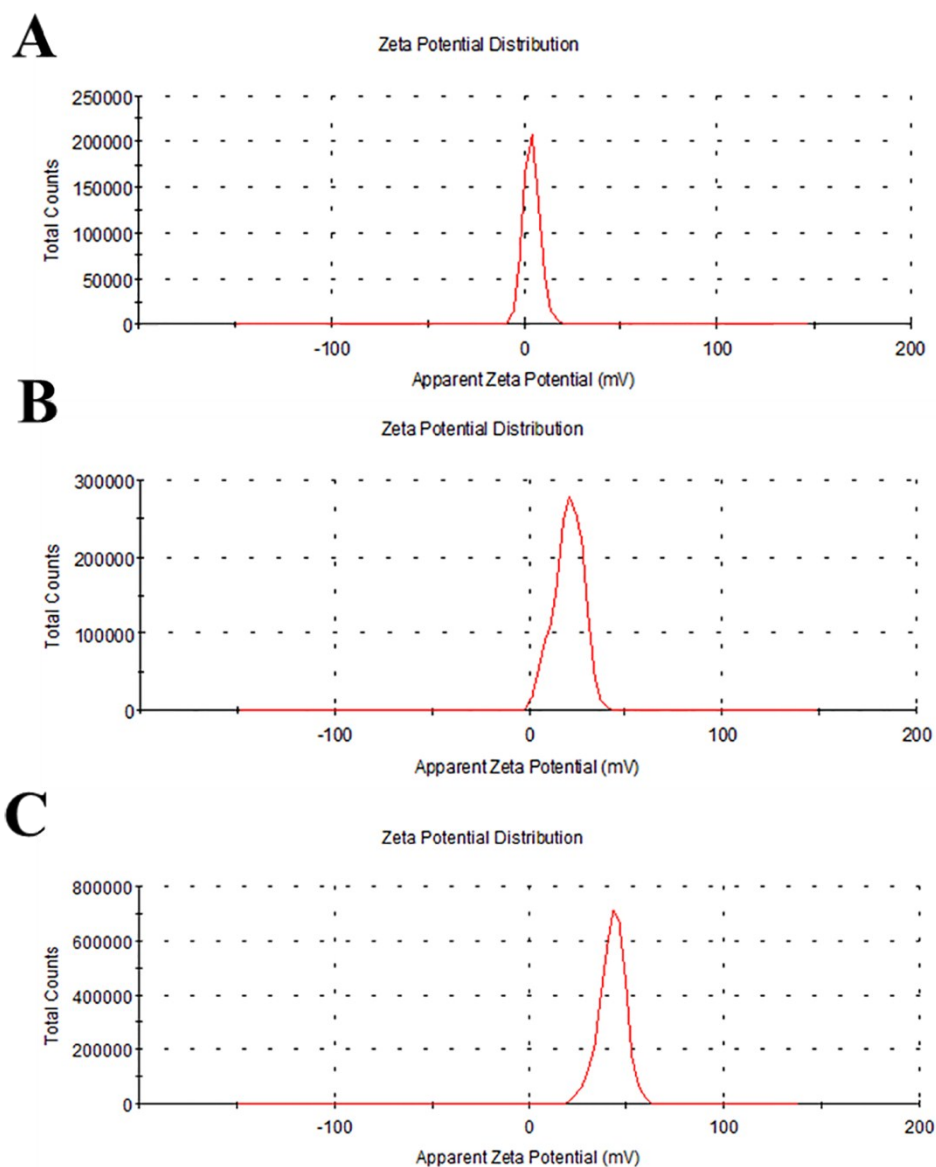

**Figure S3.** The zeta potential of (A) CQDs, (B) Au NCs and (C) Nano system.

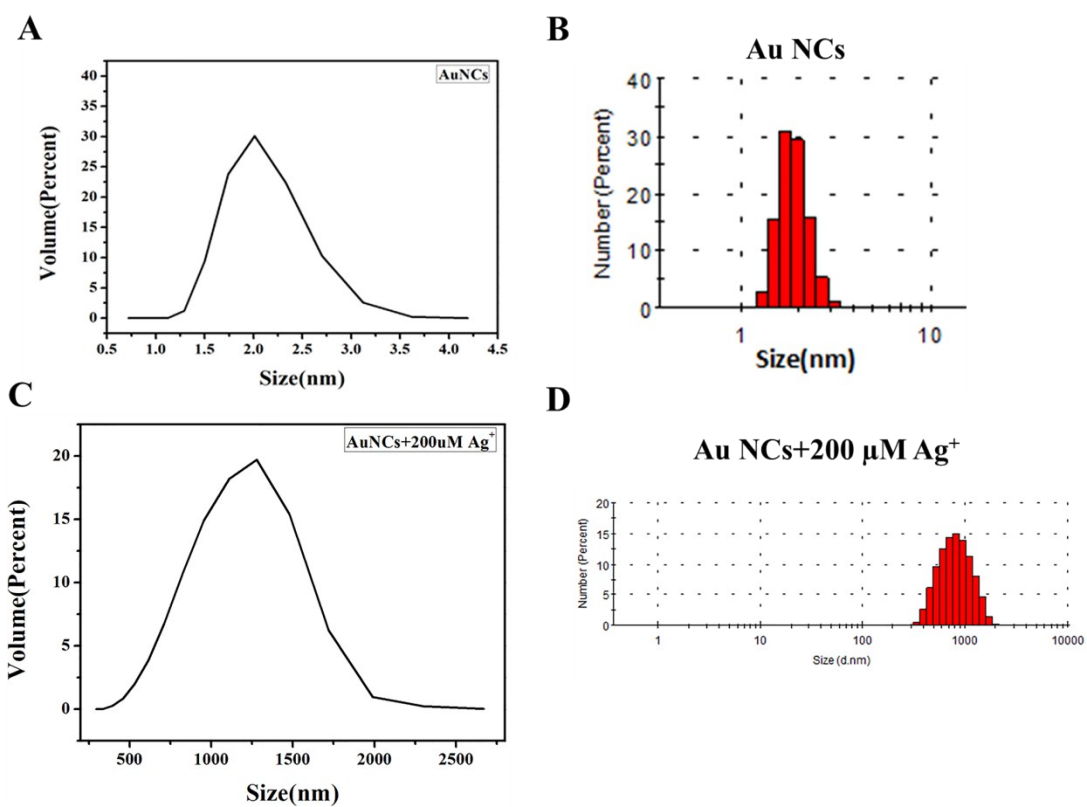

**Figure S4.** DLS analysis and corresponding size distribution histograms of AuNCs in the absence(A, B) and presence (C, D) of  $\text{Ag}^+$ .
